# Supplementary material for: Don't Ask Me If You Will Not Listen: The Dilemma of Consultative Participation
Source: Atypon-hosted journal article supplement (doi:10.1287/mnsc.2013.1786), 2013-10-30
Supplement: mnsc.2013.1786-sm-data.xlsx [file mnsc.2013.1786-sm-data.xlsx]

## Sheet: Variables_Readme
Variable	Description
Session	Session number
Treatment	Treament name
Pair	Number of pair (in the session)
A_CostFunction	Cost function selected by the agent
B_CostFunction	Cost function selected by the principal
Consult	Did principal consult agent's choice (0=False; 1=True)?
Follow	Did principal consult and follow agent's choice (0=False; 1=True)?
FinalCostFunction	Cost function implemented by the principal
Transfer	Agent's transfer
Cost	Agent's cost of the transfer
A_Earnings	Agent's earnings
B_Earnings	Principal's earnings
A_Endowment	Agent's endowment selected by the principal in treatment GX
B_NC	(Beliefs elicitation) Principals expected agents' transfers when they did not consult the agent's choice
B_CNF	(Beliefs elicitation) Principals expected agents' transfers when they consulted but did not follow the agent's choice
B_CF	(Beliefs elicitation) Principals expected agents' transfers when they consulted and followed the agent's choice
B_CO	(Beliefs elicitation) Principals expected agents' transfers when they consulted but did not follow the agent's choice and implemented a different cost function (treatment FL)
A_NC	(Beliefs elicitation) Agents' expected transfers when principals did not consult the agent's choice
A_CNF	(Beliefs elicitation) Agents' expected transfers when principals consulted but did not follow the agent's choice
A_CF	(Beliefs elicitation) Agents' expected transfers when principals consulted and followed the agent's choice
A_CO	(Beliefs elicitation) Agents' expected transfers when principals consulted but did not follow the agent's choice and implemented a different cost function (treatment FL)
AEndow9	(Beliefs elicitation) Agents' expected transfers when principals selected an endowment for the agent equal to 9 (treatment GX)
AEndow12	(Beliefs elicitation) Agents' expected transfers when principals selected an endowment for the agent equal to 12 (treatment GX)
AEndow15	(Beliefs elicitation) Agents' expected transfers when principals selected an endowment for the agent equal to 15 (treatment GX)

## Sheet: Data
Session	Treatment	Pair	A_CostFunction	B_CostFunction	Consult	Follow	FinalCostFunction	Transfer	Cost	A_Earnings	B_Earnings	A_Endowment	B_NC	B_CNF	B_CF	B_CO	A_NC	A_CNF	A_CF	A_CO	A_Endowment9	A_Endowment12	A_Endowment15
1	SC1	1	3	3	0	0	3	3	2	15	12	12
1	SC1	2	5	5	0	0	5	6	4	12	21	12
1	SC1	3	3	5	1	0	5	0	0	18	1.5	12
1	SC1	4	3	1	0	0	5	2	3	13.5	9	12
1	SC1	5	3	5	1	0	5	0	0	18	1.5	12
1	SC1	7	3	5	1	0	5	0	0	18	1.5	12
1	SC1	8	3	5	0	0	5	0	0	18	3	12
1	SC1	9	5	5	1	0	5	6	4	12	19.5	12
1	SC1	10	3	5	0	0	5	0	0	18	3	12
1	SC1	11	3	5	1	1	3	1	0	18	4.5	12
2	SC1	1	3	5	0	0	5	0	0	18	3	12
2	SC1	2	5	5	0	0	5	9	9	4.5	30	12
2	SC1	3	5	4	1	0	4	4	4	12	13.5	12
2	SC1	4	5	5	1	1	5	3	4	12	10.5	12
2	SC1	5	3	5	1	0	5	1	2	15	4.5	12
2	SC1	6	5	1	0	0	1	0	0	18	3	12
2	SC1	7	3	3	0	0	3	1	0	18	6	12
2	SC1	8	3	5	0	0	5	0	0	18	3	12
2	SC1	9	3	3	1	1	3	4	3	13.5	13.5	12
2	SC1	10	3	5	0	0	5	0	0	18	3	12
2	SC1	11	3	5	1	0	5	6	4	12	19.5	12
2	SC1	12	3	5	0	0	5	4	4	12	15	12
3	SC1	1	4	3	0	0	3	3	2	15	12	12
3	SC1	2	3	3	0	0	3	3	2	15	12	12
3	SC1	3	3	3	0	0	3	1	0	18	6	12
3	SC1	4	3	5	0	0	5	0	0	18	3	12
3	SC1	5	4	1	0	0	1	2	3	13.5	9	12
3	SC1	6	2	3	0	0	3	8	9	4.5	27	12
3	SC1	7	3	5	0	0	5	0	0	18	3	12
3	SC1	8	4	5	0	0	5	0	0	18	3	12
3	SC1	9	4	5	1	1	4	2	1	16.5	7.5	12
3	SC1	10	3	5	1	0	5	0	0	18	1.5	12
3	SC1	11	3	1	0	0	1	1	2	15	6	12
3	SC1	12	1	4	0	0	4	4	4	12	15	12
4	SC1	1	5	3	0	0	3	2	1	16.5	9	12	2	2	2		2	2	4
4	SC1	2	3	5	0	0	5	2	3	13.5	9	12	2	3	4		2	2	4
4	SC1	3	5	3	0	0	3	3	2	15	12	12	0	0	0		1	0	5
4	SC1	4	3	3	1	1	3	4	3	13.5	13.5	12	2	4	7		2	2	4
4	SC1	5	3	3	0	0	3	4	3	13.5	15	12	3	4	4		1	4	4
4	SC1	6	3	3	1	1	3	1	0	18	4.5	12	2	1	4		1	1	1
4	SC1	7	5	5	0	0	5	3	4	12	12	12	4	4	1		3	4	5
4	SC1	8	2	5	0	0	5	2	3	13.5	9	12	0	0	0		2	0	1
4	SC1	9	3	5	0	0	5	6	4	12	21	12	0	0	0		6	6	4
4	SC1	10	3	3	1	1	3	1	0	18	4.5	12	3	4	4		0	0	1
4	SC1	11	3	5	0	0	5	1	2	15	6	12	0	0	0		3	2	4
4	SC1	12	3	5	0	0	5	0	0	18	3	12	6	6	6		0	0	0
4	SC1	13	3	3	1	0	3	1	0	18	4.5	12	2	3	1		1	1	1
4	SC1	14	3	5	0	0	5	3	4	12	12	12	0	0	0		3	3	4
4	SC1	15	3	2	1	1	3	3	2	15	10.5	12	1	0	1		1	0	3
4	SC1	16	3	2	1	0	2	1	1	16.5	4.5	12	0	0	1		2	1	3
4	SC1	17	4	5	0	0	5	0	0	18	3	12	0	5	8		0	0	2
4	SC1	18	3	5	1	1	3	3	2	15	10.5	12	0	0	4		3	2	3
4	SC1	19	3	4	0	0	5	2	3	13.5	9	12	7	6	6		2	0	4
1	CHAT	1	5	3	0	0	3	3	2	15	12	12	3	3	3		3	2	6
1	CHAT	2	3	5	1	1	3	1	0	18	5.7	12	0	0	4		0	0	1
1	CHAT	3	3	3	1	0	3	2	1	16.5	8.7	12	3	1	4		3	3	3
1	CHAT	4	3	5	1	1	3	5	4	12	17.7	12	5	5	5		0	0	5
1	CHAT	5	3	5	1	1	3	5	4	12	17.7	12	5	3	5		5	5	5
1	CHAT	6	3	3	0	0	3	3	2	15	12	12	0	0	1		1.5	0	4
1	CHAT	7	3	5	0	0	5	0	0	18	3	12	0	6	7		0	0	1
1	CHAT	8	3	1	0	0	1	1	2	15	6	12	0	0	0		1	1	4
1	CHAT	9	3	5	1	1	3	3	2	15	11.7	12	0	0	3		1	0	3
1	CHAT	10	3	4	1	1	3	0	0	18	2.7	12	1	2	2		2	0	0
1	CHAT	11	3	3	1	1	3	3	2	15	11.7	12	3	4	4		0	3	3
1	CHAT	12	1	5	1	0	5	0	0	18	2.7	12	0	6	1		0	0	0
2	CHAT	1	3	1	0	0	1	0	0	18	3	12	0	4	5		0	0	1
2	CHAT	2	3	4	0	0	4	2	1	16.5	9	12	3	2	2		2	2	2
2	CHAT	3	4	3	1	1	4	3	2	15	11.7	12	3	4	5		2	2	2
2	CHAT	4	3	4	1	1	3	3	2	15	11.7	12	5	5	5		1	1	3
2	CHAT	5	3	3	1	1	3	4	3	13.5	14.7	12	3	3	4		2	4	4
2	CHAT	6	3	3	0	0	3	1	0	18	6	12	1	1	0		1	1	1
3	CHAT	1	3	3	1	0	3	4	3	13.5	14.7	12	4	1	4		2	4	4
3	CHAT	2	5	1	1	1	5	0	0	18	2.7	12	4	3	5		0	0	0
3	CHAT	3	3	4	0	0	4	3	2	15	12	12	4	2	6		3	3	4
3	CHAT	4	3	3	1	1	3	3	2	15	11.7	12	3	3	3		3	0	3
3	CHAT	5	5	5	0	0	5	0	0	18	3	12	4	2	6		0	3	7
3	CHAT	6	4	5	1	0	5	0	0	18	2.7	12	3	5	6		3	0	3
3	CHAT	7	3	3	1	0	3	4	3	13.5	14.7	12	3	3	3		3	3	3
4	CHAT	1	3	5	1	0	5	2	3	13.5	8.7	12	4	6	4		4	2	4
4	CHAT	2	3	3	0	0	3	1	0	18	6	12	4	3	6		1	1	2
4	CHAT	3	1	3	0	0	3	3	2	15	12	12	3	1	3		2	2	2
4	CHAT	4	3	3	1	1	3	3	2	15	11.7	12	0	2	4		0	0	3
4	CHAT	5	2	1	0	0	1	1	2	15	6	12	12	12	12		3	2	3
4	CHAT	6	3	5	1	1	3	1	0	18	5.7	12	5	5	5		0	0	1
4	CHAT	7	3	5	0	0	5	2	3	13.5	9	12	0	0	0		2	3	4
4	CHAT	8	3	1	1	0	1	3	4	12	11.7	12	2	1	2		3	3	3
4	CHAT	9	5	1	0	0	1	0	0	18	3	12	5	4	9		0	2	6
4	CHAT	10	3	1	0	0	3	0	0	18	3	12	0	0	0		0	0	4
4	CHAT	11	3	3	1	1	3	3	2	15	11.7	12	1	3	3		1	0	3
4	CHAT	12	3	5	1	0	5	0	0	18	2.7	12	0	4	2		1	0	1
5	CHAT	1	3	5	1	1	3	3	2	15	11.7	12	3	2	3		2	0	3
5	CHAT	2	3	3	1	0	3	1	0	18	5.7	12	0	0	1		1	1	1
5	CHAT	3	4	3	1	0	3	3	2	15	11.7	12	2	3	2		3	3	3
5	CHAT	4	3	5	1	1	3	3	2	15	11.7	12	0	0	3		2	1	3
5	CHAT	5	3	3	1	1	3	4	3	13.5	14.7	12	3	3	3		4	4	4
5	CHAT	6	5	3	1	1	3	12	12	0	38.7	12	0	12	12		12	12	12
5	CHAT	7	5	3	0	0	3	1	0	18	6	12	1	1	0		1	1	5
5	CHAT	8	3	5	1	1	3	3	2	15	11.7	12	0	1	3		0	0	3
5	CHAT	9	5	3	1	0	3	1	0	18	5.7	12	1	1	7		1	1	0
5	CHAT	10	4	3	1	1	4	1	0	18	5.7	12	1	0	1		1	1	1
5	CHAT	11	3	3	1	0	3	4	3	13.5	14.7	12	4	4	4		2	0	4
6	CHAT	1	3	5	1	0	5	0	0	18	2.7	12	6	3	5		0	0	1
6	CHAT	2	3	5	0	0	5	2	3	13.5	9	12	6	6	4		2	2	3
6	CHAT	3	4	5	1	0	5	0	0	18	2.7	12	1	6	2		3	0	5
6	CHAT	4	3	5	0	0	5	0	0	18	3	12		0	6		0	0	1
6	CHAT	5	3	5	1	1	3	4	3	13.5	14.7	12	1	0	3		1	0	1
6	CHAT	6	3	5	0	0	5	6	4	12	21	12	6	3	6		6	0	3
6	CHAT	7	5	5	1	1	5	6	4	12	20.7	12	6	6	6		6	6	6
6	CHAT	8	3	5	0	0	5	0	0	18	3	12	5	1	5		0	0	2
1	SC0	1	3	5	1	0	5	0	0	18	2.7	12
1	SC0	2	3	4	0	0	4	2	1	16.5	9	12
1	SC0	3	3	5	0	0	5	0	0	18	3	12
1	SC0	4	3	5	0	0	5	6	4	12	21	12
1	SC0	5	4	5	1	0	5	1	2	15	5.7	12
1	SC0	6	3	1	0	0	1	2	3	13.5	9	12
1	SC0	7	3	3	0	0	3	4	3	13.5	15	12
1	SC0	8	3	5	1	0	5	0	0	18	2.7	12
1	SC0	9	3	5	0	0	5	2	3	13.5	9	12
1	SC0	10	3	3	0	0	3	2	1	16.5	9	12
1	SC0	11	3	4	0	0	4	1	0	18	6	12
1	SC0	12	4	5	1	0	5	6	4	12	20.7	12
2	SC0	1	3	5	1	0	5	0	0	18	2.7	12
2	SC0	2	1	3	1	1	1	1	2	15	5.7	12
2	SC0	3	2	5	1	0	5	0	0	18	2.7	12
2	SC0	4	5	3	1	0	3	0	0	18	2.7	12
2	SC0	5	4	3	0	0	3	2	1	16.5	9	12
2	SC0	6	4	3	0	0	3	1	0	18	6	12
2	SC0	7	5	5	0	0	5	6	4	12	21	12
2	SC0	8	5	3	0	0	3	1	0	18	6	12
2	SC0	9	5	1	0	0	1	0	0	18	3	12
2	SC0	10	3	2	0	0	2	3	3	13.5	12	12
2	SC0	11	3	3	0	0	3	3	2	15	12	12
2	SC0	12	3	1	1	0	1	3	4	12	11.7	12
3	SC0	1	3	5	1	1	3	3	2	15	11.7	12
3	SC0	2	3	5	1	0	5	0	0	18	2.7	12
3	SC0	3	5	3	1	1	5	6	4	12	20.7	12
3	SC0	4	3	3	1	1	3	3	2	15	11.7	12
3	SC0	5	3	4	0	0	4	1	0	18	6	12
3	SC0	6	3	2	0	0	2	0	0	18	3	12
3	SC0	7	3	5	0	0	5	1	2	15	6	12
3	SC0	8	3	2	0	0	2	3	3	13.5	12	12
3	SC0	9	3	1	0	0	1	0	0	18	3	12
3	SC0	10	3	5	0	0	5	2	3	13.5	9	12
3	SC0	11	2	3	1	1	2	6	6	9	20.7	12
3	SC0	12	2	5	1	0	5	1	2	15	5.7	12
4	SC0	1	3	5	0	0	5	0	0	18	3	12	6	2	2		0	2	5
4	SC0	2	5	3	0	0	3	4	3	13.5	15	12	1	1	4		4	4	2
4	SC0	3	3	5	1	1	3	1	0	18	5.7	12	0	0	6		1	0	1
4	SC0	4	4	3	1	1	4	1	0	18	5.7	12	4	4	4		1	0	1
4	SC0	5	3	3	1	1	3	2	1	16.5	8.7	12	1	1	3		2	2	2
4	SC0	6	4	3	1	0	3	1	0	18	5.7	12	3.5	3.5	3		0	0	0
4	SC0	8	3	5	1	0	5	0	0	18	2.7	12	2	0	3		0	0	1
4	SC0	9	3	4	1	0	4	1	0	18	5.7	12	3	3	5		1	1	1
4	SC0	10	5	5	1	1	5	4	4	12	14.7	12	7	2	11		5	2	4
4	SC0	11	5	5	0	0	5	6	4	12	21	12	6	6	5		6	6	6
4	SC0	12	3	3	1	1	3	2	1	16.5	8.7	12	3	4	5		3	2	2
5	SC0	1	5	1	1	1	5	7	5	10.5	23.7	12	3	2	6		2	7	7
5	SC0	2	5	3	1	1	5	6	4	12	20.7	12	4	6	4		6	3	6
5	SC0	3	3	2	1	1	3	1	0	18	5.7	12	0	0	3		1	0.5	1
5	SC0	4	3	3	1	1	3	3	2	15	11.7	12	6	0	4		1	0	3
5	SC0	5	3	5	1	1	3	3	2	15	11.7	12	1	0	1		3	1	3
5	SC0	6	3	1	1	1	3	1	0	18	5.7	12	3	2	4		0	1	1
5	SC0	7	3	5	0	0	5	6	4	12	21	12	6	6	6		4	4	4
5	SC0	8	5	3	0	0	3	5	4	12	18	12	3	3	3		5	4	6
5	SC0	9	3	5	1	0	5	6	4	12	20.7	12	2	3	4		0	6	1
5	SC0	10	3	5	1	1	3	4	3	13.5	14.7	12	4	6	5		3	2	4
5	SC0	11	3	1	1	0	1	2	3	13.5	8.7	12	5	8	5		4	2	4
5	SC0	12	5	3	0	0	3	0	0	18	3	12	1	1	1		0	0	3
1	FL	1	5	3	0	0	3	1	0	18	6	12	3	3	4	3	1	1	1	1
1	FL	2	5	3	1	2	4	3	2	15	11.7	12	0	0	0	1	7	3	7	3
1	FL	3	5	5	1	1	5	0	0	18	2.7	12	2	3	6	3	0	0	0	0
1	FL	4	1	3	1	0	3	1	0	18	5.7	12	0	0	0	0	0	1	0	0
1	FL	5	3	1	0	0	1	2	3	13.5	9	12	0	0	0	0	4	4	4	4
1	FL	6	3	3	0	0	3	1	0	18	6	12	0	0	1	0	1	1	1	1
1	FL	7	5	5	1	1	5	1	2	15	5.7	12	6	6	6	3	1	1	1	1
1	FL	8	3	5	0	0	5	0	0	18	3	12	3	3	3	3	0	0	0	0
1	FL	9	3	5	1	0	5	0	0	18	2.7	12	5	6	5	6	1	0	1	0
1	FL	10	3	3	1	1	3	0	0	18	2.7	12	1	0	1	1	0	0	0	0
1	FL	11	1	1	1	1	1	0	0	18	2.7	12	6	4	5	6	0	0	0	0
1	FL	12	3	5	0	0	5	1	2	15	6	12	0	0	5	5	1	1	3	0
1	FL	13	5	3	1	1	5	4	4	12	14.7	12	1	1	0	0	3	4	6	4
1	FL	14	4	1	1	1	4	3	2	15	11.7	12	10	6	2	5	2	1	3	1
1	FL	15	4	4	1	0	4	1	0	18	5.7	12	3	3	3	6	1	1	1	0
1	FL	16	3	5	1	1	3	0	0	18	2.7	12	1	2	4	2	0	0	0	0
1	FL	17	3	1	1	0	1	0	0	18	2.7	12	0	0	1	0	0	0	1	0
1	FL	18	3	3	1	1	3	3	2	15	11.7	12	1	1	2	0	0	0	3	0
1	FL	19	4	5	0	0	5	0	0	18	3	12	0	0	0	1	0	0	1	0
2	FL	1	3	5	1	1	3	1	0	18	5.7	12	0	1	5	3	0	0	1	0
2	FL	2	3	3	0	0	3	3	2	15	12	12	1	0	2	2	3	3	3	0
2	FL	3	3	2	1	1	3	3	2	15	11.7	12	1	1	3	3	4	3	4	3
2	FL	4	3	3	0	0	3	3	2	15	12	12	1	1	1	1	4	4	4	4
2	FL	5	3	4	0	0	4	3	2	15	12	12	5	2	7	4	3	3	3	3
2	FL	6	5	3	0	0	3	0	0	18	3	12	0	0	0	0	0	0	0	0
2	FL	7	3	5	0	0	5	1	2	15	6	12	5	5	5	5	1	1	3	1
2	FL	8	3	3	0	0	3	1	0	18	6	12	1	1	0	0	0	0	1	0
2	FL	9	4	5	1	1	4	3	2	15	11.7	12	1	0	4	1	4	3	3	3
2	FL	10	3	3	0	0	3	3	2	15	12	12	0	0	0	0	2	1	3	0
2	FL	11	3	5	1	1	3	2	1	16.5	8.7	12	0	0	1	0	0	0	2	0
2	FL	12	5	1	1	0	1	0	0	18	2.7	12	2	2	1	1	0	0	1	0
2	FL	13	5	5	1	1	5	0	0	18	2.7	12	3	3	3	1	0	0	0	0
2	FL	14	3	3	1	1	3	2	1	16.5	8.7	12	4	1	4	0	3	1	2	2
2	FL	15	5	2	0	0	2	2	2	15	9	12	0	0	0	0	2	2	3	1
2	FL	16	3	5	0	0	5	3	4	12	12	12	3	3	4	1	3	3	4	3
2	FL	17	5	5	0	0	5	12	12	0	39	12	0	3	10	0	12	12	12	12
2	FL	18	4	5	1	0	5	1	2	15	5.7	12	4	6	4	5	1	1	2	1
2	FL	19	3	1	1	1	3	3	2	15	11.7	12	0	0	1	0	2	1	3	1
2	FL	20	3	5	1	1	3	3	2	15	11.7	12	0	0	1	1	2	3	1	1
3	FL	1	3	2	0	0	2	1	1	16.5	6	12	0	0	0	0	1	1	2	1
3	FL	2	5	3	0	2	5	5	4	12	18	12	3	1	1	6	5	2	7	11
3	FL	3	3	1	0	0	1	0	0	18	3	12	1	0	0	2	0	0	0	0
3	FL	4	3	5	1	0	5	0	0	18	2.7	12	2	3	2	3	0	0	3	1
3	FL	5	4	1	1	2	3	3	2	15	11.7	12	3	4	3	4	3	3	3	3
3	FL	6	5	1	0	0	1	3	4	12	12	12	0	0	0	0	4	3	4	3
3	FL	7	3	1	0	0	1	0	0	18	3	12	1	1	1	1	0	0	0	0
3	FL	8	3	4	1	1	3	1	0	18	5.7	12	3	0	6	4	0	1	1	1
3	FL	9	5	5	0	0	5	12	12	0	39	12	3	3	3	3	12	12	12	12
3	FL	10	3	5	1	1	3	3	2	15	11.7	12	1	2	3	2	2	2	3	3
3	FL	11	3	5	0	0	5	0	0	18	3	12	3	1	5	3	1	0	2	1
3	FL	12	5	3	0	0	3	4	3	13.5	15	12	0	0	2	0	4	4	6	3
3	FL	13	1	3	1	0	3	1	0	18	5.7	12	8	5	6	0	1	1	0	1
3	FL	14	5	5	1	1	5	6	4	12	20.7	12	3	3	3	1	4	4	6	3
3	FL	15	5	3	0	0	3	5	4	12	18	12	2	0	3	2	5	5	7	4
3	FL	16	3	3	1	1	3	3	2	15	11.7	12	0	0	2	0	0	1	3	0
3	FL	17	3	3	1	1	3	1	0	18	5.7	12			3		1	1	1	1
3	FL	18	5	3	0	0	3	4	3	13.5	15	12	0	0	0	0	3	4	6	0
1	GX	1	3	3	1	1	3	2	1	16.5	13.2	12	1	2	2		2	2	2		0	2	4
1	GX	2	2	3	1	0	3	2	1	16.5	13.2	12	2	2	3		2	2	3		1	2	4
1	GX	3	3	4	1	0	4	0	0	13.5	11.7	9	0	1	1		0	0	6		0	6	6
1	GX	4	3	3	0	0	3	1	0	13.5	15	9	1	1	1		1	1	1		1	2	4
1	GX	5	3	3	1	0	3	1	0	18	10.2	12	1	1	3		0	0	1		0	0	3
1	GX	6	3	5	0	0	5	0	0	13.5	12	9	4	5	5		0	0	1		0	3	6
1	GX	7	3	3	1	1	3	1	0	13.5	14.7	9	1	1	1		0	0	1		1	2	3
1	GX	8	3	5	1	0	5	1	2	15	10.2	12	12	12	12		2	1	3		1	1	3
1	GX	9	3	5	0	0	5	2	3	13.5	13.5	12	2	2	6		2	3	3		0	2	4
1	GX	10	4	3	1	1	4	1	0	13.5	14.7	9	0	1	2		1	1	1		1	2	2
1	GX	11	5	3	0	0	3	1	0	13.5	15	9	1	0	2		1	1	0		1	3	6
1	GX	12	3	1	0	0	1	0	0	13.5	12	9	5	5	6		0	0	0		0	0	0
1	GX	13	3	3	1	0	3	0	0	13.5	11.7	9	0	0	1		0	1	1		0	1	3
1	GX	14	3	3	0	0	3	0	0	13.5	12	9	1	0	1		0	0	0		0	1	1
1	GX	15	5	5	1	1	5	2	3	13.5	13.2	12	4	0	8		1	1	2		0	2	2
1	GX	16	3	2	0	0	3	2	1	21	9	15	7	3	4		2	2	2		2	2	2
1	GX	17	5	3	0	0	3	0	0	13.5	12	9	1	1	1		6	4	7		0	2	2
1	GX	18	5	3	1	1	5	0	0	13.5	11.7	9	3	0	5		0	0	0		0	0	2
1	GX	19	3	1	0	0	1	0	0	13.5	12	9	2	3	5		0	0	2		0	3	5
1	GX	20	3	4	0	0	4	0	0	13.5	12	9	1				0	0	0		0	0	0
2	GX	1	5	3	0	0	3	5	4	12	22.5	12	4	4	4		0	0	0		0	0	0
2	GX	2	3	5	0	0	5	0	0	13.5	12	9	6	6	5			0	2		0	1	1
2	GX	3	3	3	0	0	3	1	0	13.5	15	9	0	0	0		6	6	7		6	6	7
2	GX	4	5	3	0	0	3	2	1	12	18	9	3	0	4		2	1	2		0	4	6
2	GX	5	5	3	1	0	3	1	0	13.5	14.7	9	0	1	2		0	0	3		0	3	5
2	GX	6	4	3	1	1	4	0	0	13.5	11.7	9	1	2	2		6	12	12		5	12	12
2	GX	7	3	5	1	0	5	0	0	13.5	11.7	9	1	1	2		1	0	1		0	0	1
2	GX	8	5	3	0	0	5	4	4	7.5	24	9	0	0	0		0	0	1		0	1	1
2	GX	9	3	5	1	0	5	0	0	13.5	11.7	9	0	0	1		4	4	1		4	2	1
2	GX	10	3	5	1	0	5	0	0	13.5	11.7	9	0	0	1		1	1	2		1	2	0
2	GX	11	5	5	1	1	5	6	4	16.5	20.7	15			6		0	0	1		0	1	2
2	GX	12	4	5	0	0	5	1	2	10.5	15	9	1	3	8		1	0	1		0	1	2
2	GX	13	3	4	1	0	4	2	1	16.5	13.2	12	0	1	1		0	0	2		0	2	3
2	GX	14	4	4	0	0	4	2	1	21	9	15	2	12	12		7	7	9		8	11	12
2	GX	15	3	3	0	0	3	1	0	13.5	15	9	2	0	4		2	2	2		2	2	2
2	GX	16	3	1	0	0	1	0	0	13.5	12	9	12	6	3		0	0	1		0	0	1
3	GX	1	4	5	0	0	5	0	0	18	7.5	12	4	1	6		5	5	6		2	5	5
3	GX	2	3	5	1	1	3	1	0	18	10.2	12	6	6	5		0	0	1		0	0	6
3	GX	3	2	3	1	0	3	0	0	13.5	11.7	9	0	1	0		1	1	1		1	2	2
3	GX	4	3	5	1	0	5	1	2	15	10.2	12	4	6	6		2	6	6		2	3	4
3	GX	5	4	5	0	0	5	0	0	13.5	12	9	0	0	3		0	1	4		1	4	6
3	GX	6	4	1	0	0	1	0	0	13.5	12	9	0	4	2		0	0	0		0	0	0
3	GX	7	5	5	0	0	5	6	4	7.5	30	9	6	3	5		2	0	2		0	3	5
3	GX	8	5	3	1	1	5	0	0	13.5	11.7	9	0	0	2		4	4	6		4	5	5
3	GX	9	3	3	1	1	3	3	2	15	16.2	12			3		0	0	0		0	0	0
3	GX	10	3	3	0	0	3	6	6	4.5	30	9	0	1	0		1	0	1		1	6	7
3	GX	11	3	5	1	0	5	0	0	18	7.2	12	7	6	1		12	12	7		6	6	6
3	GX	12	3	5	0	0	5	0	0	13.5	12	9	3	4	3		1	1	1		1	2	1
3	GX	13	2	5	1	0	5	4	4	7.5	23.7	9	9	9	9		2	2	2		1	2	5
3	GX	14	3	3	0	0	5	1	2	15	10.5	12	2	1	1		1	2	4		0	2	4
3	GX	15	4	5	1	1	4	1	0	13.5	14.7	9			1		1	0	1		1	2	4
3	GX	16	3	5	1	0	5	0	0	13.5	11.7	9	1	1	1		0	0	1		0	1	1
3	GX	17	3	2	1	0	2	0	0	18	7.2	12	0	0	1		0	0	1		0	0	0
3	GX	18	3	4	1	1	3	8	9	0	35.7	9	1	3	4		1	1	1		1	1	1
3	GX	19	3	3	0	0	3	2	1	12	18	9	0	0	0		3	2	3		0	3	4
3	GX	20	3	5	1	0	5	0	0	18	7.2	12	1	6	1		2	2	2		0	2	4
1	NC	1	3	5	0	0	5	0	0	18	3	12
1	NC	2	1	5	0	0	5	2	3	13.5	9	12
1	NC	3	1	3	0	0	3	2	1	16.5	9	12
1	NC	4	3	5	0	0	5	0	0	18	3	12
1	NC	5	3	5	0	0	5	0	0	18	3	12
1	NC	6	5	5	0	0	5	6	4	12	21	12
1	NC	7	3	4	0	0	4	2	1	16.5	9	12
1	NC	8	5	3	0	0	3	4	3	13.5	15	12
1	NC	9	5	3	0	0	3	1	0	18	6	12
1	NC	10	5	3	0	0	3	5	4	12	18	12
1	NC	11	1	5	0	0	5	1	2	15	6	12
1	NC	12	3	3	0	0	3	1	0	18	6	12
1	NC	13	3	3	0	0	3	2	1	16.5	9	12
1	NC	14	3	3	0	0	3	1	0	18	6	12
1	NC	15	3	1	0	0	1	0	0	18	3	12
1	NC	16	3	3	0	0	3	0	0	18	3	12
1	NC	17	3	3	0	0	3	1	0	18	6	12
1	NC	18	3	3	0	0	3	1	0	18	6	12
1	NC	19	3	3	0	0	3	1	0	18	6	12
1	NC	20	3	1	0	0	1	0	0	18	3	12
2	NC	1	3	3	0	0	3	1	0	18	6	12
2	NC	2	3	5	0	0	5	1	2	15	6	12
2	NC	3	3	3	0	0	3	3	2	15	12	12
2	NC	4	2	3	0	0	3	3	2	15	12	12
2	NC	5	3	5	0	0	5	1	2	15	6	12
2	NC	6	3	1	0	0	1	0	0	18	3	12
2	NC	7	3	5	0	0	5	0	0	18	3	12
2	NC	8	3	3	0	0	3	1	0	18	6	12
2	NC	9	5	5	0	0	5	6	4	12	21	12
2	NC	10	3	5	0	0	5	6	4	12	21	12
2	NC	11	3	3	0	0	3	4	3	13.5	15	12
2	NC	12	3	5	0	0	5	0	0	18	3	12
2	NC	13	5	5	0	0	5	1	2	15	6	12
2	NC	14	4	5	0	0	5	0	0	18	3	12
2	NC	15	3	5	0	0	5	0	0	18	3	12
2	NC	16	3	3	0	0	3	1	0	18	6	12
2	NC	17	3	3	0	0	3	4	3	13.5	15	12
2	NC	18	5	5	0	0	5	2	3	13.5	9	12
3	NC	1	3	5	0	0	5	2	3	13.5	9	12
3	NC	2	5	5	0	0	5	0	0	18	3	12
3	NC	3	3	3	0	0	3	3	2	15	12	12
3	NC	4	3	3	0	0	3	2	1	16.5	9	12
3	NC	5	3	5	0	0	5	0	0	18	3	12
3	NC	6	4	3	0	0	3	1	0	18	6	12
3	NC	7	5	3	0	0	3	5	4	12	18	12
3	NC	8	3	3	0	0	3	1	0	18	6	12
3	NC	9	3	3	0	0	3	2	1	16.5	9	12
3	NC	10	3	5	0	0	5	2	3	13.5	9	12
4	NC	1	3	3	0	0	3	1	0	18	6	12
4	NC	2	3	5	0	0	5	0	0	18	3	12
4	NC	3	3	5	0	0	5	0	0	18	3	12
4	NC	4	4	1	0	0	1	0	0	18	3	12
4	NC	5	1	3	0	0	3	3	2	15	12	12
4	NC	6	3	5	0	0	5	2	3	13.5	9	12
4	NC	7	3	5	0	0	5	0	0	18	3	12
4	NC	8	5	5	0	0	5	2	3	13.5	9	12
4	NC	9	3	5	0	0	5	3	4	12	12	12
4	NC	10	3	3	0	0	3	3	2	15	12	12
4	NC	11	1	5	0	0	5	3	4	12	12	12
4	NC	12	3	3	0	0	3	3	2	15	12	12
